# Supplementary material for: Small molecules targeting coxsackievirus A16 capsid inactivate viral particles and prevent viral binding
Source: PubMed Central journal article supplement (PMC6156566; doi:10.1038/s41426-018-0165-3), 2018-09-26
Supplement: 41426_2018_165_MOESM1_ESM.pdf [file 41426_2018_165_MOESM1_ESM.pdf]

## Supplementary Information

### **Small Molecules Targeting Coxsackievirus A16 Capsid Inactivate Viral Particles and Prevent Virus Binding**

Chien-Ju Lin<sup>1</sup>, Ching-Hsuan Liu<sup>2,3</sup>, Jonathan Y. Wang<sup>4</sup>, Chun-Ching Lin<sup>1,5</sup>, Yi-Fang Li<sup>5</sup>,  
Christopher D. Richardson<sup>3,6</sup>, and Liang-Tzung Lin<sup>2,7,#</sup>

<sup>1</sup> School of Pharmacy, College of Pharmacy, Kaohsiung Medical University, Kaohsiung 80708, Taiwan

<sup>2</sup> Graduate Institute of Medical Sciences, College of Medicine, Taipei Medical University, Taipei 11031, Taiwan

<sup>3</sup> Department of Microbiology & Immunology, Dalhousie University, Halifax, Nova Scotia B3H 4R2, Canada

<sup>4</sup> Department of Molecular Biosciences, The University of Texas at Austin, Austin, Texas 78712, United States of America

<sup>5</sup> Graduate Institute of Natural Products, College of Pharmacy, Kaohsiung Medical University, Kaohsiung 80708, Taiwan

<sup>6</sup> Department of Pediatrics and Canadian Center for Vaccinology, Izaak Walton Killam Health Centre, Halifax, Nova Scotia B3K 6R8, Canada

<sup>7</sup> Department of Microbiology and Immunology, School of Medicine, College of Medicine, Taipei Medical University, Taipei 11031, Taiwan

#### **#CORRESPONDING AUTHOR**

Liang-Tzung Lin, Department of Microbiology and Immunology, School of Medicine, College of Medicine, Taipei Medical University, No. 250, Wu-Hsing Street, Taipei 11031, Taiwan, Tel: +886-2-2736-1661 ext. 3911, Fax: +886-2-2736-1661 ext. 3921, E-mail: [ltlin@tmu.edu.tw](mailto:ltlin@tmu.edu.tw).

Supplementary Figure

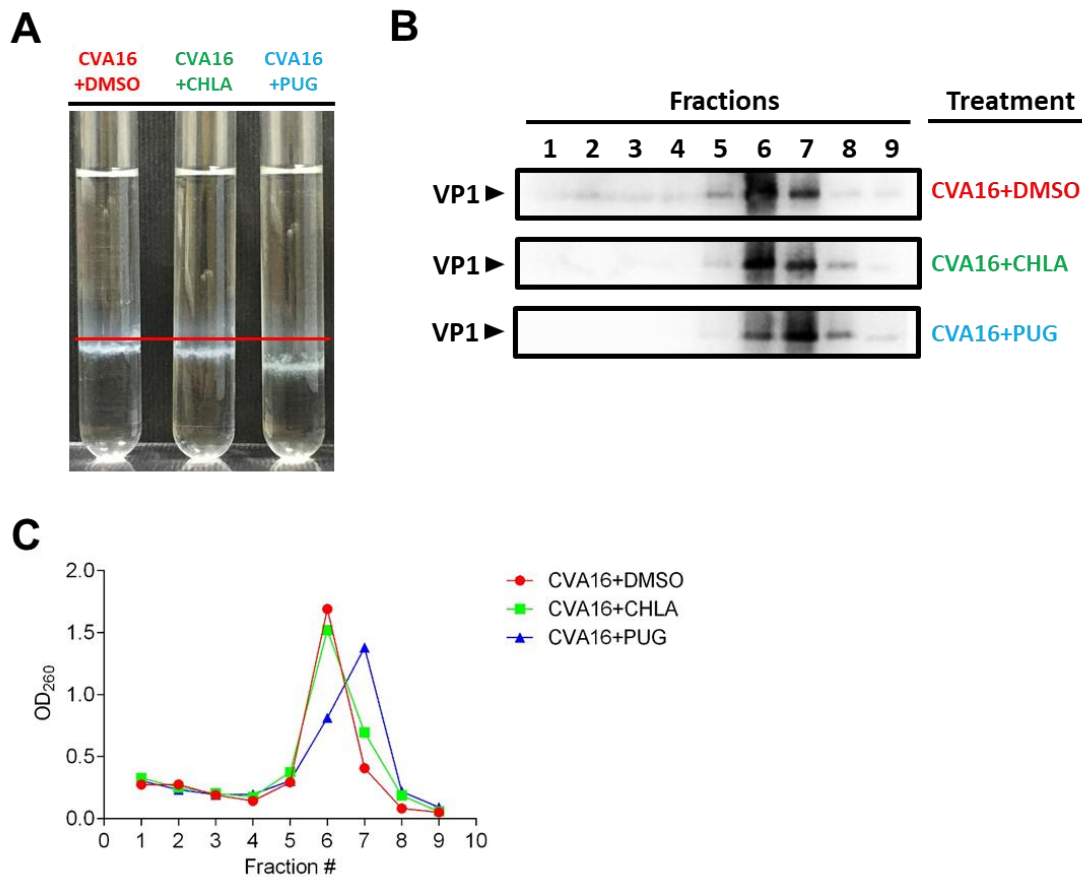

**Fig. S1. Ultracentrifugation analysis of CVA16 particles treated with the tannins.**

Polyethylene glycol-8000 (PEG8000)-concentrated CVA16 virions were treated with DMSO (0.25%), CHLA (20  $\mu$ M) or PUG (25  $\mu$ M) for 1 h at 37  $^{\circ}$ C. The drug-treated virus samples were layered onto a 20% to 60% sucrose gradient in 50 mM Tris-HCl (pH = 7), and then subjected to ultracentrifugation in a Beckman SW40 Ti rotor (Beckman Coulter; Brea, CA, USA) at 35,000 rpm for 3 h at 4  $^{\circ}$ C. Sedimentation of the virions at the end of the ultracentrifugation run is shown (a). Nine fractions (1 ml/fraction) from the ultracentrifugation were subsequently taken from top to bottom and subjected to Western blot analysis (b) and optical density assessment (c). For Western blot analysis, 18  $\mu$ l of the fractions were subjected to SDS-PAGE and then transferred to PVDF membrane, which was blocked with 5% BSA for 1 h; the membrane was subsequently probed using anti-VP1 primary antibody (1:2000; Millipore) and anti-mouse HRP-conjugated secondary antibody (1:2000; Invitrogen) before detecting and imaging immunoreactive proteins using enhanced chemiluminescence reagent (Western Lightning ECL Pro; PerkinElmer, Waltham, MA, USA) and a Bio-Rad ChemiDoc Imager (Bio-Rad; Hercules, CA, USA). For measurement of optical density, individual fractions from the ultracentrifugation were diluted 5 times using ddH<sub>2</sub>O and then analyzed using a spectrophotometer (Eppendorf; Hamburg, Germany) at 260 nm.
